## RESEARCH ARTICLE

# Aerobic scope and cardiovascular oxygen transport is not compromised at high temperatures in the toad *Rhinella marina*

Johannes Overgaard<sup>1,\*</sup>, Jonas L. Andersen<sup>1</sup>, Anders Findsen<sup>1</sup>, Pil B. M. Pedersen<sup>1</sup>, Kasper Hansen<sup>1</sup>, Karlina Ozolina<sup>1,2</sup> and Tobias Wang<sup>1</sup>

<sup>1</sup>Department of Bioscience, Aarhus University, C.F. Møllers Allé 3, Building 1131, DK-8000, Aarhus C, Denmark and <sup>2</sup>Faculty of Life Sciences, University of Manchester, Michael Smith Building, Oxford Road, Manchester M13 9PT, UK

\*Author for correspondence (biojo@biology.au.dk)

## SUMMARY

Numerous recent studies convincingly correlate the upper thermal tolerance limit of aquatic ectothermic animals to reduced aerobic scope, and ascribe the decline in aerobic scope to failure of the cardiovascular system at high temperatures. In the present study we investigate whether this ‘aerobic scope model’ applies to an air-breathing and semi-terrestrial vertebrate *Rhinella marina* (formerly *Bufo marinus*). To quantify aerobic scope, we measured resting and maximal rate of oxygen consumption at temperatures ranging from 10 to 40°C. To include potential effects of acclimation, three groups of toads were acclimated chronically at 20, 25 and 30°C, respectively. The absolute difference between resting and maximal rate of oxygen consumption increased progressively with temperature and there was no significant decrease in aerobic scope, even at temperature immediately below the lethal limit (41–42°C). Haematological and cardiorespiratory variables were measured at rest and immediately after maximal activity at benign (30°C) and critically high (40°C) temperatures. Within this temperature interval, both resting and active heart rate increased, and there was no indication of respiratory failure, judged from high arterial oxygen saturation,  $P_{O_2}$  and  $[HbO_2]$ . With the exception of elevated resting metabolic rate for cold-acclimated toads, we found few differences in the thermal responses between acclimation groups with regard to the cardiometabolic parameters. In conclusion, we found no evidence for temperature-induced cardiorespiratory failure in *R. marina*, indicating that maintenance of aerobic scope and oxygen transport is unrelated to the upper thermal limit of this air-breathing semi-terrestrial vertebrate.

Key words: oxygen limitation hypothesis, amphibian, *Bufo marinus*, climate change, heat tolerance, pejus, maximal energy consumption, ventilation, heart rate.

Received 16 January 2012; Accepted 25 June 2012

## INTRODUCTION

Temperature directly affects the rates of virtually all physiological and biochemical processes, and environmental temperature is arguably one of the most important factors defining the fundamental niche for animals (Cossins and Bowler, 1987; Schmidt-Nielsen, 1997; Angilletta, 2009). Given the direct influence of temperature on population growth, survival and sustained motor function, it is not surprising that shifts in species distributions can be correlated to the current rise in global temperature (Parmesan and Yohe, 2003; Thomas et al., 2004; Perry et al., 2005). To understand and model how future global warming scenarios will affect species, a predictive framework is needed, and different approaches are therefore being promoted to assess the relative susceptibility of species to climate change (Deutsch et al., 2008; Pörtner and Farrell, 2008; Williams et al., 2008; Hofmann and Todgham, 2010; Somero, 2010). Although still debated (e.g. Clark et al., 2005a; Clark et al., 2011; Marshall et al., 2011; Keen and Gamperl, 2012), an influential physiological approach emphasizes the negative effects of high temperature on aerobic scope, i.e. the decline in the difference between minimal oxygen requirements and maximal rate of oxygen uptake as temperature increases (Pörtner, 2001; Pörtner and Knust, 2007). Thus a number of studies convincingly correlate reduced aerobic scope to environmental and climate-related impacts on

performance and fitness (Pörtner and Knust, 2007; Eliason et al., 2011; Neuheimer et al., 2011). The theoretical rationale is that the aerobic scope determines the scope for fitness-related activities, such as feeding, locomotion, growth and reproduction (Fry and Hart, 1948; McCormick et al., 1972; Pörtner, 2001). Most studies linking aerobic scope to whole animal performance in vertebrates, however, concern aquatic organisms. Thus it has rarely been studied whether aerobic scope provides a reliable indicator of thermal sensitivity and fitness in air-breathing vertebrates.

The aerobic scope model predicts that parts of the oxygen transport cascade become limiting at high temperature. Air-breathing vertebrates differ from water-breathing vertebrates in at least two respects that could potentially influence the thermal sensitivity of the oxygen transport cascade. Firstly, because oxygen solubility in water decreases with increasing temperature, the ventilatory requirements of water-breathers is expected to increase proportionally more than metabolism when temperature increases (Dejours, 1975). Secondly, the cardiovascular systems of many air-breathing ectothermic vertebrates, including amphibians, are more complex than in fish (e.g. Johansen and Hanson, 1968; Wang et al., 1999). Thus while the fish heart partially relies on oxygen of venous blood returning to the heart, the left side of the ventricle in air-breathing ectothermic vertebrates receives oxygenated blood returning from the lungs (MacKinnon and Heatwole, 1981; Farmer, 1997; Farrell et al., 2009).

Due to the differences highlighted above, it is clear that ventilatory and cardiovascular challenges at high temperature differ between air- and water-breathing ectothermic vertebrates. The objective of the present study was to examine how aerobic scope changes with temperature in an air-breathing amphibian, *Rhinella marina*. Numerous studies show that aerobic scope increases with temperature in amphibians, including toads (Whitford, 1973; Carey, 1979), and the thermal dependence of the cardiorespiratory system has previously been studied in *R. marina* (Feder, 1982; Hillman et al., 1985; Hillman, 1987; Withers et al., 1988; Gamperl et al., 1999; Hedrick et al., 1999; Andersen et al., 2001; Bicego-Nahas et al., 2001; Andersen and Wang, 2002; Andersen and Wang, 2003; Seebacher and Franklin, 2011). Recently it was suggested that the aerobic scope model (oxygen limitation hypothesis) might not apply to *R. marina* (Seebacher and Franklin, 2011), but measurements of oxygen transport capacity and aerobic scope have not been performed at temperatures approaching the critical/lethal limit. A critical evaluation of the aerobic scope model demands that resting and maximal rate of oxygen consumption are correlated with simultaneous cardiorespiratory measurements across a broad thermal range, including temperatures close to the upper thermal limit. The upper thermal limit of *R. marina*, assessed from loss of muscular control, is approximately 41–42°C (Stuart, 1951; Krakauer, 1970; Johnson, 1972). Heat tolerance, however, is influenced by prior acclimation (Brattstrom, 1968).

Here we present resting and maximal oxygen consumption rates from low (10°C) to stressfully high temperatures (40°C). To specifically address temperature sensitivity of circulation and ventilation, we measured heart rate and blood pressure, as well as arterial blood gases at both benign (30°C) and stressfully high temperatures (40°C). To include the potential role of thermal acclimation, we studied animals chronically acclimated to 20, 25 and 30°C. We specifically test the hypothesis that aerobic scope decreases at high temperatures in an air-breathing ectothermic vertebrate and that this decrease is associated with reduction in cardiovascular and ventilatory capacities. Moreover, we test the hypothesis that chronic heat acclimation markedly improves heat tolerance through an increased oxygen transport capacity in warm-acclimated animals.

## MATERIALS AND METHODS

### Experimental animals and acclimation regime

Thirty-six adult cane toads [*Rhinella marina* (Linnaeus 1758), formerly *Bufo marinus*] of unknown sex weighing between 60 and 170 g (97±4.3 g, mean ± s.e.m.) were purchased from Exotic Tropicals Herpetoculture (Barbados, West Indies) and transported to the University of Aarhus. To study the influence of thermal acclimation on cardiorespiratory variables as well as resting and maximal oxygen consumption rate, the toads were randomly divided into three acclimation groups ( $N=12$  in each) shortly after arrival and kept at a 12 h light:12 h dark cycle at constant temperatures of 20, 25 and 30°C, respectively, for a minimum of 7 weeks before the onset of experiments. During acclimation and the preceding experimental period, the animals were kept in containers with free access to fresh water and substrate for burrowing. The toads were fed mealworms and crickets twice weekly; food, however, was withheld for 48 h before instrumentation.

### Experimental protocol

Rates of resting and maximal oxygen consumption (RMR and  $\dot{V}_{O_{2,max}}$ , respectively) were measured in six toads from each acclimation group at temperatures between 10 and 40°C over a 6-

month period. The order of temperatures studied was chosen at random (30, 20, 15, 10, 35, 40, 25, 36 and 38°C) to avoid possible directional acclimation effects during the acute exposures. All three acclimation groups were always measured at the same temperature in the same week and there was always at least 1 week between measurements at different temperatures. Before each measurement we moved toads directly from their housing temperature to the experimental temperature and let the animals settle at this temperature for approximately 24 h before measurements of oxygen consumption rate.

After measurements of oxygen consumption rate, the toads were maintained at their acclimation temperature for approximately 2 months before blood pressure and haematological parameters were measured at rest and during activity at 30 and 40°C, respectively. Thirty degrees Celsius represents a 'normal' high temperature, while 40°C is close to the upper lethal limit (Stuart, 1951; Krakauer, 1970; Johnson, 1972) and may, therefore, be associated with cardiovascular collapse. Animals were taken directly from their acclimation temperature, operated, recovered at room temperature and then placed at either 30 or 40°C at random. The animals were left at the 'first' experimental temperature for at least 18 h before measurements of haematological variables and subsequently moved to the 'other' experimental temperature for 24 h before the final set of measurements was obtained.

### Measurements of the rate of oxygen consumption in resting and active toads

RMR and  $\dot{V}_{O_{2,max}}$  were measured using closed respirometry using the methodology described by Withers et al. (Withers et al., 1988) and Andersen and Wang (Andersen and Wang, 2003). On the day of measurements the animals were enclosed in 3-litre cylindrical chambers, placed in an incubator at constant temperature and light intensity and given a continuous air supply at high humidity. The toads were kept with minimal disturbance for no less than 3 h to provide three consecutive measurements of RMR. To minimize the influence of spontaneous activity, the lowest RMR value was used for further analysis. Given the duration of experiments using closed respirometry these measurements represent our lowest assessment of routine oxygen consumption rate in calm and unrestrained animals (due to the limited activity and calm nature of the experimental animals we will subsequently refer to these measurements as RMR). During measurements of RMR the chambers were sealed for 60–160 min. Air samples were withdrawn at the beginning and end of this period and analysed for fractional oxygen content in a gas analyser (O<sub>2</sub> S-3 A; Applied Electrochemistry, Sunnyvale, CA, USA). For measurements of  $\dot{V}_{O_{2,max}}$ , the toads were made to exercise for 4 min by manual rotation of the cylindrical chamber in a water bath at the experimental temperature, as this procedure has been shown to maximize  $\dot{V}_{O_2}$  in anuran amphibians (Withers et al., 1988). The fractional content of the container never fell below 18%, and we assume that metabolism was unaffected by the altered CO<sub>2</sub> and O<sub>2</sub> concentrations.

### Arterial cannulation

Toads were anaesthetized by immersion in a 1.0 g l<sup>-1</sup> benzocaine solution (ethyl *p*-amino benzoate, Sigma E1501, Sigma-Aldrich, St Louis, MO, USA) at room temperature until the corneal reflex disappeared. The femoral artery was occlusively cannulated through an incision in the hindleg, which was closed by sutures. The toads were placed under running tap water to recover for approximately 30 min; Andersen and Wang (Andersen and Wang, 2002) showed that blood gases return to normal values within 6 h upon a similar

Table 1. The effect of experimental temperature on resting and maximal oxygen consumption in *Rhinella marina* acclimated to 20, 25 or 30°C

| Temperature (°C) | 20°C acclimation         |                           | 25°C acclimation           |                           | 30°C acclimation           |                           |
|------------------|--------------------------|---------------------------|----------------------------|---------------------------|----------------------------|---------------------------|
|                  | RMR                      | $\dot{V}_{O_{2,max}}$     | RMR                        | $\dot{V}_{O_{2,max}}$     | RMR                        | $\dot{V}_{O_{2,max}}$     |
| 10               | 0.22±0.03 <sup>a</sup>   | 3.37±0.25 <sup>a</sup>    | 0.19±0.02 <sup>a</sup>     | 3.48±0.66 <sup>a</sup>    | 0.21±0.02 <sup>a</sup>     | 3.76±0.60 <sup>a</sup>    |
| 15               | 0.36±0.04 <sup>a,b</sup> | 6.12±0.68 <sup>b</sup>    | 0.32±0.02 <sup>b</sup>     | 5.86±0.78 <sup>b</sup>    | 0.39±0.02 <sup>b</sup>     | 8.79±0.80 <sup>b</sup>    |
| 20               | 0.56±0.06 <sup>b,c</sup> | 7.77±0.68 <sup>b</sup>    | 0.40±0.05 <sup>b,c</sup>   | 8.48±0.74 <sup>b</sup>    | 0.39±0.04 <sup>b</sup>     | 7.26±0.55 <sup>b</sup>    |
| 25               | 0.87±0.07 <sup>c,d</sup> | 12.97±1.38 <sup>c</sup>   | 0.67±0.03 <sup>c</sup>     | 10.56±1.13 <sup>c</sup>   | 0.55±0.05 <sup>b,c</sup>   | 10.11±0.82 <sup>c</sup>   |
| 30               | 0.96±0.04 <sup>d</sup>   | 19.28±1.62 <sup>d</sup>   | 0.76±0.06 <sup>c,d</sup>   | 13.42±1.59 <sup>d</sup>   | 0.74±0.07 <sup>c,d</sup>   | 12.51±1.47 <sup>d</sup>   |
| 35               | 1.76±0.19 <sup>e</sup>   | 16.26±1.58 <sup>d</sup>   | 1.38±0.22 <sup>d,f</sup>   | 13.92±1.14 <sup>d</sup>   | 0.88±0.07 <sup>c,d,e</sup> | 14.14±0.95 <sup>d</sup>   |
| 36               | 1.57±0.08 <sup>d,e</sup> | 20.02±1.43 <sup>d,e</sup> | 1.58±0.08 <sup>e,f</sup>   | 17.60±1.18 <sup>d,e</sup> | 0.97±0.09 <sup>c,d,e</sup> | 15.05±1.56 <sup>d,e</sup> |
| 38               | 2.13±0.30 <sup>e</sup>   | 21.75±1.60 <sup>e</sup>   | 1.95±0.12 <sup>e</sup>     | 21.85±1.46 <sup>e</sup>   | 1.43±0.17 <sup>e</sup>     | 19.93±1.72 <sup>e</sup>   |
| 40               | 1.64±0.16 <sup>d,e</sup> | 17.13±1.04 <sup>d,e</sup> | 1.23±0.12 <sup>d,e,f</sup> | 19.03±1.59 <sup>d,e</sup> | 1.20±0.09 <sup>c,d,e</sup> | 18.53±2.14 <sup>d,e</sup> |

Values are means ± s.e.m. of RMR ( $\dot{V}_{O_{2,rest}}$ ) and  $\dot{V}_{O_{2,max}}$  (both in ml O<sub>2</sub> kg<sup>-1</sup> min<sup>-1</sup>). The effect of experimental temperature and acclimation group were tested independently for RMR and  $\dot{V}_{O_{2,max}}$  using a two-way ANOVA (on log-transformed data). There were no significant effects of acclimation regime on  $\dot{V}_{O_{2,max}}$ , but RMR showed different responses between acclimation groups. Recordings at experimental temperatures that differ significantly are indicated by the use of dissimilar letters.

procedure. Each animal was subsequently transferred to an experimental container (40×30×20 cm) with wet paper towels and placed in a climatic chamber, at the relevant experimental temperature for at least 18 h before blood sampling. Toads were shielded from visual and auditory disturbances during blood sampling.

#### Blood pressure and heart rate

Mean arterial blood pressure (MAP) was measured by connecting the femoral catheter to a Baxter Edward (model PX600, Irvine, CA, USA) disposable pressure transducer. The signal was amplified using an in-house built pre-amplifier and calibrated daily against a static water column. Signals from the blood pressure transducer were collected digitally with a BioPac MP 100 (BioPac Systems, Santa Barbara, CA, USA) at 50 Hz. Heart rate ( $f_H$ ) was derived from the pulsatile blood pressure. A continuous recording of 3–8 min was used for each measurement to determine MAP and  $f_H$ .

#### Haematological parameters and blood gases

Arterial blood samples were taken from resting undisturbed animals, and immediately upon exhaustion after enforced activity, and analysed immediately for oxygen tension ( $P_{aO_2}$ ), pH<sub>a</sub>, haematocrit, blood haemoglobin concentration ([Hb<sub>4</sub>]), oxygen concentration ([O<sub>2</sub>]<sub>a</sub>) and total carbon dioxide content of plasma ([CO<sub>2</sub>]<sub>pl</sub>).  $P_{aO_2}$  and pH<sub>a</sub> were measured with Radiometer (Copenhagen, Denmark) electrodes maintained at the same temperature as the animal and connected to a Radiometer PHM 73. Haematocrit was determined as the fractional red cell volume after centrifugation (14,500 g for 3 min) and [Hb<sub>4</sub>] was measured after conversion to cyanmethaemoglobin, applying a millimolar extinction coefficient of 10.99 at 540 nm (Zijlstra et al., 1983). Arterial [O<sub>2</sub>] was measured as described by Tucker (Tucker, 1967), with the correction pointed out by Bridge et al. (Bridge et al., 1979). Haemoglobin bound oxygen (HbO<sub>2</sub>) was calculated as: [O<sub>2</sub>]<sub>a</sub>–( $\alpha_{O_2}$ × $P_{aO_2}$ ), where  $\alpha_{O_2}$  is the blood oxygen solubility determined by Christoforides and Hedley-Whyte (Christoforides and Hedley-Whyte, 1969), and haemoglobin oxygen saturation was subsequently calculated as: HbO<sub>2,sat</sub>=HbO<sub>2</sub>/[Hb], under the assumption that all Hb was functional.

Plasma [CO<sub>2</sub>] was measured according to Cameron (Cameron, 1971). Arterial  $P_{CO_2}$  ( $P_{aCO_2}$ ) and plasma [HCO<sub>3</sub><sup>-</sup>] were calculated from the Henderson–Hasselbalch equation with the plasma solubility of CO<sub>2</sub> ( $\alpha_{CO_2}$ ) provided by Boutilier et al. (Boutilier et al., 1979), and an apparent pK' derived from Heisler (Heisler, 1986). Plasma

lactate concentrations were measured using an YSI 1500 SPORT lactate analyser (YSI Life Sciences, Yellow Springs, OH, USA).

#### Statistical analysis

The effects of acclimation and temperature on RMR and  $\dot{V}_{O_{2,max}}$  as well as absolute and factorial aerobic scopes were tested using a two-way ANOVA upon log transformation due to unequal variance. All haematological and cardiovascular parameters were tested using a three-way ANOVA [with the factors test temperature (30 vs 40°C), acclimation group (20, 25 and 30°C) and activity level (rest or exercise)]. The level of significance was chosen at the  $P<0.05$  level following a Bonferroni correction. Values are presented as means ± 1 s.e.m.

## RESULTS

### Oxygen consumption rate at rest and activity

Resting metabolic rate at 10°C ranged between 0.19 and 0.22 ml kg<sup>-1</sup> min<sup>-1</sup> for the three acclimation groups and increased exponentially with temperature, reaching 1.43–2.13 ml kg<sup>-1</sup> min<sup>-1</sup> at 38°C (Table 1, Fig. 1A). There was a significant interaction between experimental temperature and acclimation, such that RMR of toads acclimated to 20°C was significantly higher than RMR of the other acclimation groups when this was measured at 30°C. A consequence of the experimental protocol employed here is that the last measurements of oxygen consumption rate were performed on animals acclimated for more than 8 months, while the first measurements were performed in animals with only 2 months acclimation. However, the order of experimental temperatures was randomised and given the limited observed effect of thermal acclimation on rate of oxygen consumption, we believe that any putative effects of acclimation duration are minor.

$\dot{V}_{O_{2,max}}$  also increased with temperature and reached a maximum of 19.9–21.9 ml kg<sup>-1</sup> min<sup>-1</sup> at 38°C independent of acclimation (Table 1, Fig. 1B). This value was not significantly larger than that measured at 36 or 40°C. Aerobic scope is presented as the absolute difference between RMR and  $\dot{V}_{O_{2,max}}$  as well as the factorial rise between rest and activity in Fig 1C,D. Independent of acclimation, absolute aerobic scope increased from around 3 ml kg<sup>-1</sup> min<sup>-1</sup> at 10°C to almost 20 ml kg<sup>-1</sup> min<sup>-1</sup> at 38°C. Aerobic scope seemed to stabilize at the higher temperatures, and there were no significant differences in the range between 36 and 40°C. The pattern was considerably altered when aerobic scope was presented as the factorial increase in the rate of oxygen consumption (Fig. 1D).

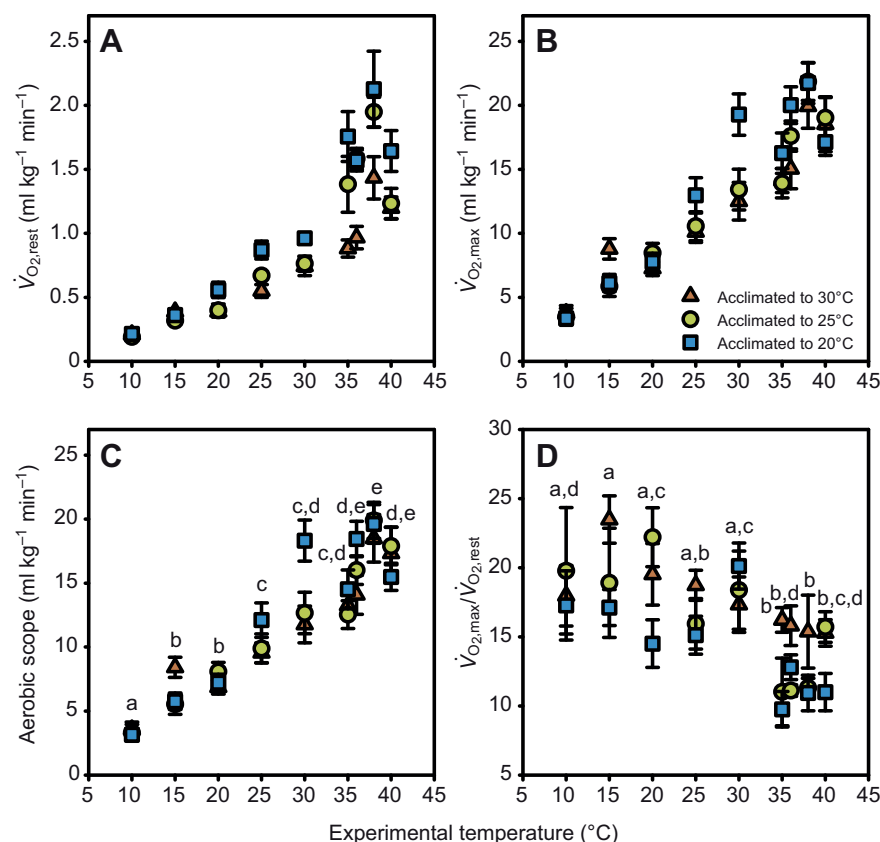

Fig. 1. The effect of experimental temperature on resting (A;  $\dot{V}_{O_{2,rest}}$ ) and maximal (B;  $\dot{V}_{O_{2,max}}$ ) oxygen consumption in *Rhinella marina* acclimated to 20, 25 or 30°C, respectively (see Table 1 for values and statistics). The absolute aerobic scope (C; aerobic scope) is calculated from the difference between  $\dot{V}_{O_{2,max}}$  and  $\dot{V}_{O_{2,rest}}$ . Factorial aerobic scope (D;  $\dot{V}_{O_{2,max}}/\dot{V}_{O_{2,rest}}$ ) is calculated from the ratio between  $\dot{V}_{O_{2,max}}$  and  $\dot{V}_{O_{2,rest}}$ . Values with different letters differ significantly ( $P < 0.05$ ).  $N=5-6$  for each group and error bars indicate s.e.m.

Factorial aerobic scope was generally higher (17–20) at temperatures from 30°C and below, while the factorial difference between maximal and resting values were around 10–15 at temperatures from 35 to 40°C. We also found a significant effect of acclimation, where the 20°C-acclimated toads generally had lower factorial aerobic scope. This probably results from the higher RMR in this group.

#### Cardiovascular and haematological responses to activity at 30 and 40°C

Heart rate ( $f_H$ ) at rest and during activity increased significantly with temperature (from  $36.7 \pm 3.7$  to  $62.0 \pm 3.8$  beats  $\text{min}^{-1}$  [ $Q_{10}=1.7$ ] at rest and from  $71.7 \pm 3.8$  to  $92.9 \pm 3.9$  beats  $\text{min}^{-1}$  [ $Q_{10}=1.3$ ] during exercise) (Fig. 2A). Mean arterial blood pressure (MAP) did not change with increased temperature, but rose significantly in response to exercise. Due to a significant interaction between experimental temperature and exercise, the effect of exercise was larger at 30°C ( $35.9 \pm 2.2$  to  $57.8 \pm 2.2$  cmH<sub>2</sub>O) than at 40°C ( $38.1 \pm 2.2$  to  $48.6 \pm 2.3$  cmH<sub>2</sub>O) (Fig. 2B). There was no effect of temperature acclimation on  $f_H$  or MAP.

Haematocrit (Hct) was lower in toads acclimated to 20°C than toads acclimated to 30°C, but was not affected by experimental temperature. Hct increased significantly during exercise (from 15 to 20%, Fig. 3A) accompanied by a similar rise in blood oxygen concentration and [Hb] (Fig. 3B). There was an indication of cellular swelling as mean cellular haemoglobin concentration (MCHC) decreased slightly with both temperature and exercise (Fig. 3C).

Arterial  $P_{O_2}$  was generally above 80 mmHg in all acclimation groups and increased when temperature was increased from 30 to 40°C (Fig. 4A). Exercise was also associated with increased HbO<sub>2</sub> saturation as calculated from the ratio of the estimated amount of haemoglobin-bound oxygen and the measured Hb concentration ( $[\text{HbO}_2]/[\text{Hb}]_{\text{total}}$ ). There were no significant differences in saturation

in any of our three factors, such that saturation remained high irrespective of acclimation, activity level and temperature (Fig. 4B).

As seen in Fig. 5A, arterial pH of resting toads was similar in all acclimation groups and pH decreased significantly when temperature was increased from 30 to 40°C, due to a significant rise in arterial  $P_{\text{CO}_2}$  ( $12.4 \pm 0.5$  to  $16.7 \pm 0.7$  mmHg; Fig. 4C), while plasma  $[\text{HCO}_3^-]$  did not change (Fig. 5C). Arterial pH fell significantly upon exercise at both temperatures, reaching  $7.60 \pm 0.03$  and  $7.51 \pm 0.03$  at 30 and 40°C, respectively (Fig. 5A). This acidosis was primarily metabolic in origin as the average change in plasma  $[\text{HCO}_3^-]$  across all acclimation groups was a decrease from  $22.3 \pm 0.73$  to  $13.8 \pm 0.71$  mmol  $\text{l}^{-1}$  (Fig. 5C) in response to an almost equimolar rise in plasma lactate from ~1 to 10 mmol  $\text{l}^{-1}$  following exercise (Fig. 5B).

#### DISCUSSION

Several recent studies on fish and aquatic invertebrates emphasize collapse of the cardiorespiratory system's abilities to deliver adequate amounts of oxygen to the respiring tissues as the primary determinant for upper thermal tolerance (Pörtner, 2001; Pörtner and Knust, 2007; Pörtner and Farrell, 2008; Somero, 2010; Verberk and Calosi, 2012). While this aerobic scope model requires much more investigation in water-breathing as well as air-breathing vertebrates, we demonstrate here that cardiorespiratory failure is an unlikely determinant of the upper thermal limit in the toad *R. marina*. Thus we found little evidence for reductions in either  $\dot{V}_{O_{2,max}}$ , heart rate, arterial oxygen saturation or aerobic scope at temperatures immediately below the lethal temperature (41–42°C; Stuart, 1951; Brattstrom, 1968; Krakauer, 1970; Johnson, 1972). The 'aerobic scope model' is based on the correlation between the dwindling aerobic scope and the reduced growth and overall performance with increased temperatures (see Fry and Hart, 1948; Brett, 1971; McCormick et al., 1972; Pörtner and Knust, 2007). There are several



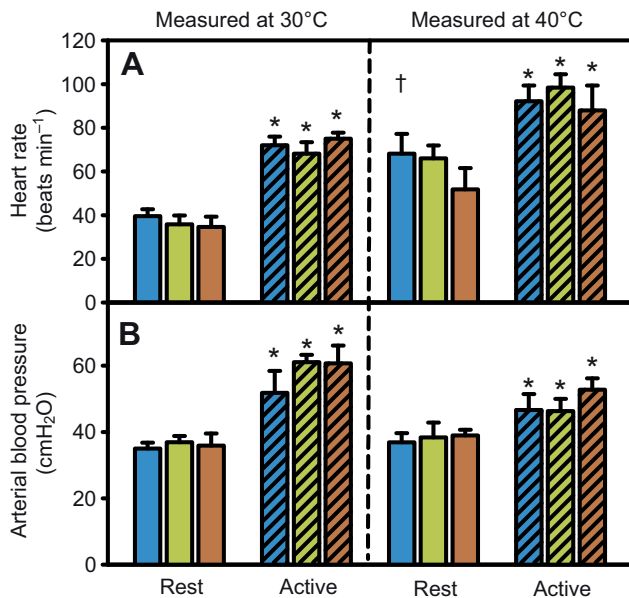

Fig. 2. Heart rate (A) and arterial blood pressure (B) measures at 30 and 40°C during rest (open bars) and forced activity (hatched bars) in *Rhinella marina*. Animals chronically acclimated to 20, 25 and 30°C are shown in blue, green and orange, respectively. \*Significant effect of activity ( $P < 0.05$ ); †overall significant effect of temperature ( $P < 0.05$ ).  $N = 5-6$  for each group and error bars indicate s.e.m.

examples of correlated reductions in aerobic scope, oxygen transport capacity and fitness with elevated temperatures in fishes (Pörtner and Knust, 2007; Nilsson et al., 2009; Eliason et al., 2011; Neuheimer et al., 2011) and also in aquatic invertebrates (Pörtner, 2001; Somero, 2010; Somero, 2012; Verberk and Calosi, 2012). However, there is contradicting evidence for fish studies regarding the relation between thermal tolerance and aerobic scope (Clark et al., 2005a; Clark et al., 2011; Keen and Gamperl, 2012) and aquatic invertebrates (Marshall et al., 2011), and it also seems that thermal tolerance in air-breathing animals is determined by other factors than oxygen transport capacity. Thus in accordance with our study on toads, the aerobic scope model does not seem to apply to terrestrial insects (Klok et al., 2004; Stevens et al., 2010). These other factors could include protein denaturation, effects on membrane fluidity, thermal inactivation of enzymes at rates that exceed rates of formation and different temperature effects ( $Q_{10}$ ) in interdependent metabolic reactions (Cossins and Bowler, 1987; Schmidt-Nielsen, 1997), but our study cannot address the relative importance of such factors.

It is possible that differences between water- and air-breathers may reside with the larger ventilatory requirements for water-breathers, which, in combination with the decreased oxygen solubility as water temperature increases, pose larger limitations on the rate of oxygen uptake. In addition, it has been argued that the spongy inner myocardium in fish, being largely devoid of coronary supply, is more susceptible to decreased venous oxygen levels at higher temperatures (Farrell and Clutterham, 2003). The anuran ventricle is also largely spongy (Johansen and Hanson, 1968) and lacks coronary supply to the ventricle (MacKinnon and Heatwole, 1981). However, because the left side of the anuran heart receives oxygenated blood from the lungs, it is possible that myocardial oxygen delivery is unaffected by low venous oxygen levels during exercise at high temperatures.

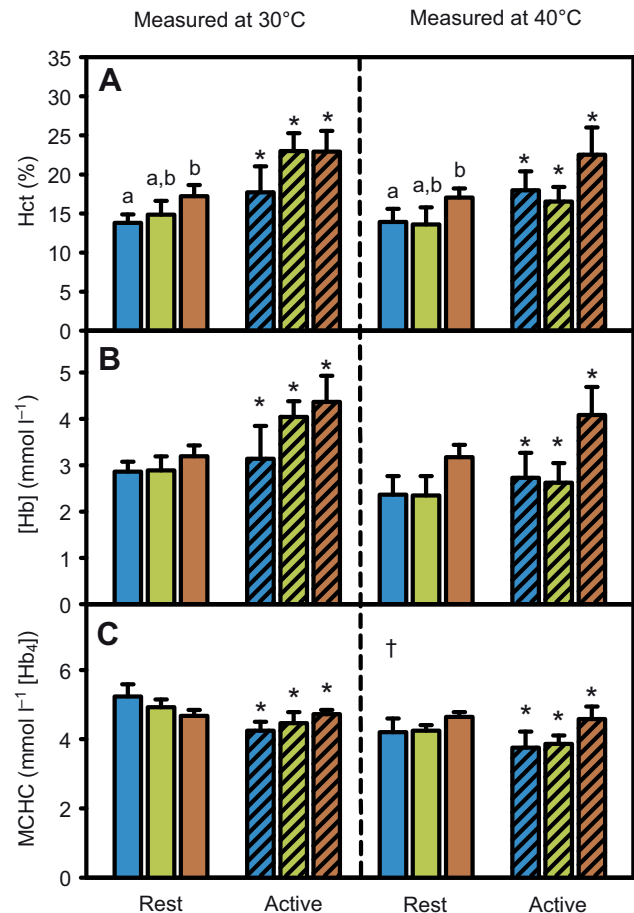

Fig. 3. Haematocrit (A; Hct), haemoglobin concentration (B; [Hb]) and mean cellular haemoglobin concentration (C; MCHC) measured at 30 and 40°C during rest (open bars) and forced activity (hatched bars) in *Rhinella marina*. Animals chronically acclimated to 20, 25 and 30°C are shown in blue, green and orange, respectively. \*Significant effect of activity ( $P < 0.05$ ); †overall significant effect of temperature ( $P < 0.05$ ) and dissimilar letters indicate an effect of acclimation group.  $N = 5-6$  for each group and error bars indicate s.e.m.

Numerous studies have characterised the thermal dependence of cardiorespiratory functions in amphibians, including *R. marina* (see Whitford, 1973; Carey, 1979; Feder, 1982; Hillman et al., 1985; Hillman, 1987; Withers et al., 1988; Gamperl et al., 1999; Hedrick et al., 1999; Andersen et al., 2001; Bicego-Nahas et al., 2001; Andersen and Wang, 2002; Andersen et al., 2003; Andersen and Wang, 2003; Seebacher and Franklin, 2011). These studies (and references within) clearly show that some cardiorespiratory parameters are sensitive to both seasonal and experimental factors (Gamperl et al., 1999; Bicego-Nahas et al., 2001; Andersen et al., 2003; Seebacher and Franklin, 2011). Nonetheless, the measurements presented here are generally in accordance with those observed in these previous studies performed at lower temperatures. However, the heart rate of active toads at 30°C measured in our study is slightly lower than those reported by Hedrick et al. (Hedrick et al., 1999) and Seebacher and Franklin (Seebacher and Franklin, 2011).

The present study is the first to report measures of metabolism and cardio-respiratory parameters in amphibians exercising above 30°C. We found high arterial O<sub>2</sub> saturation even at the highest

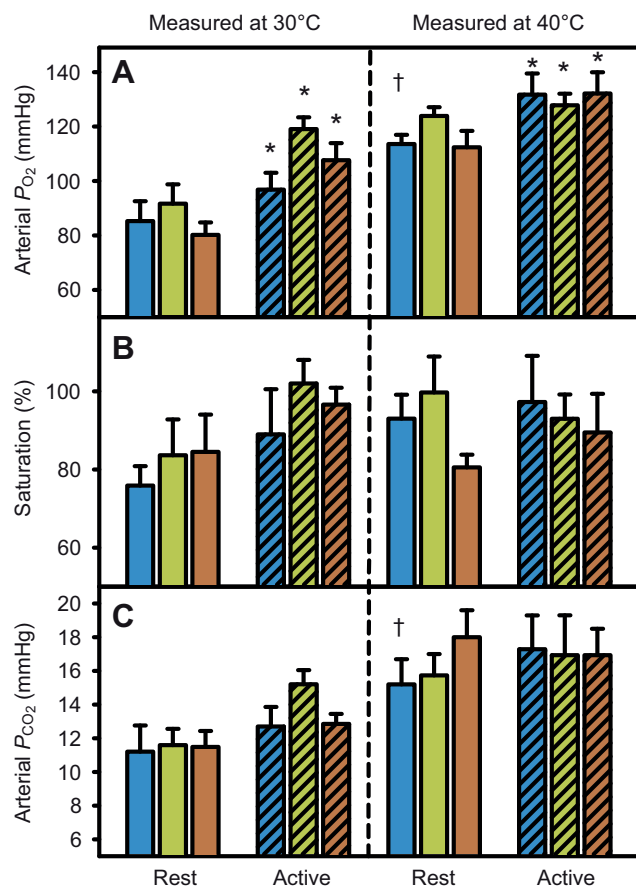

Fig. 4. Arterial  $P_{O_2}$  (A), haemoglobin saturation (B) and arterial  $P_{CO_2}$  (C) measured at 30 and 40°C during rest (open bars) and forced activity (hatched bars) in *Rhinella marina*. Animals chronically acclimated to 20, 25 and 30°C are shown in blue, green and orange, respectively. \*Significant effect of activity ( $P < 0.05$ ); †overall significant effect of temperature ( $P < 0.05$ ).  $N=5-6$  for each group and error bars indicate s.e.m.

temperatures indicate very low levels of right-to-left (R-L) shunt, which is somewhat at odds with the study of Hedrick et al. (Hedrick et al., 1999), which concluded that intra-cardiac mixing increases at high heart rates. However, it is also possible that the comparatively low heart rates observed in our study (see discussion above) avoided marked increases in the cardiac R-L shunt. Even though we did not measure blood flows, we can estimate a minimal required systemic stroke volume during  $\dot{V}_{O_{2,max}}$  on the basis of the measured arterial  $O_2$  concentration and an assumption of 80%  $O_2$  extraction. Using this approach, we estimate systemic stroke volumes of 3.8, 4.1 and 2.9 ml beat $^{-1}$  at 40°C for 20, 25 and 30°C-acclimated toads, respectively. These estimates are slightly larger than direct measurements with Doppler flow probes (Hillman et al., 1985; Hedrick et al., 1999), and emphasize that the arterial-venous  $O_2$  extraction is indeed very high during exercise as reported in previous studies (Withers et al., 1988; Hedrick et al., 1999; Seebacher and Franklin, 2011). It is possible that the high oxygen extraction is facilitated by the right-shifted oxygen dissociation curve as temperature increases and pH falls due to lactic acidosis (Andersen et al., 2001).

We found no evidence for the oxygen-limiting hypothesis in the ventilatory and diffusive parts of the oxygen delivery cascade. High arterial  $O_2$  levels demonstrate that there is no major limitation for

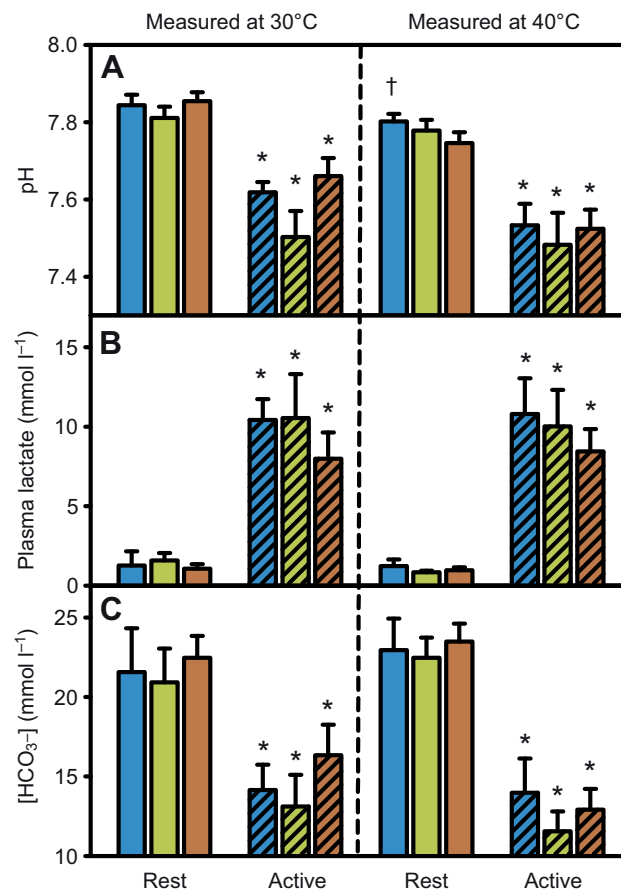

Fig. 5. pH (A), plasma lactate (B) and bicarbonate concentration (C;  $[HCO_3^-]$ ) measured at 30 and 40°C during rest (open bars) and forced activity (hatched bars) in *Rhinella marina*. Animals chronically acclimated to 20, 25 and 30°C are shown in blue, green and orange, respectively. \*Significant effect of activity ( $P < 0.05$ ); †overall significant effect of temperature ( $P < 0.05$ ).  $N=5-6$  for each group and error bars indicate s.e.m.

gas exchange across the lungs and the presumed low venous  $O_2$  levels indicate that the diffusive capacity in the tissues is adequate, even during exercise at high temperatures. While exercise was associated with considerable anaerobic metabolism, the lactate levels measured in plasma were not higher at 40°C compared with 30°C. However, because of the low  $Q_{10}$  for heart rate between 30 and 40°C ( $Q_{10}=1.17-1.44$  for the three acclimation groups, respectively), it is possible that the cardiac capacity is approaching a limitation at 40°C, which may contribute to the apparent plateau of  $\dot{V}_{O_{2,max}}$  and decreasing factorial aerobic scope above 36°C. Thus  $\dot{V}_{O_{2,max}}$  did tend to decline above 36°C, but this reduction was not statistically significant. Nonetheless, oxygen transport capacity remains more than 10-fold above resting needs at a temperature marginally below the lethal limit and this low  $Q_{10}$  is therefore unlikely to be the main cause of thermal collapse. Indeed, previous studies of air-breathing vertebrates stipulate that factorial and absolute scope is retained at high temperatures [see Whitford (Whitford, 1973), Carey (Carey, 1979) and Clark et al. (Clark et al., 2005b), and references therein]. Another prediction of the aerobic scope model is that lactate will start to accumulate even under routine conditions once the capacity of the oxygen transport system becomes inadequate. This was clearly not the case in our study, where blood lactate levels at rest remained at the low levels reported at lower

temperatures (Andersen and Wang, 2002; Andersen and Wang, 2003; Seebacher and Franklin, 2011).

Acclimation (phenotypic plasticity) has the potential to alter oxygen transport capacity and/or thermal tolerance and must be considered when evaluating putative consequences of climate change (Wang and Overgaard, 2007; Hofmann and Todgham, 2010; Seebacher and Franklin, 2011). Seebacher and Franklin (Seebacher and Franklin, 2011) recently suggested that *R. marina* show compensatory acclimation that maintains aerobic scope, but aerobic scope was not measured. In our study, there were virtually no differences between acclimation groups (20, 25 or 30°C), which suggest that thermal acclimation has little impact on maximal oxygen transport capacity and aerobic scope. Also, as reported previously (Feder, 1982; Seebacher and Franklin, 2011), cold-acclimated toads had slightly elevated RMR, particularly at higher temperatures. This pattern was less obvious for  $\dot{V}_{O_{2,max}}$ , where cold-acclimated toads only had an elevated rate of oxygen consumption at 30°C. However, by virtue of the large factorial aerobic scope in *R. marina*, small differences in resting metabolism are unlikely to have any considerable impact on absolute aerobic scope – which is quite similar between acclimation groups at the highest temperatures. Thermal acclimation, nevertheless, may be important for other aspects since the observed differences in RMR may reflect differences in anabolic and catabolic turnover. Curiously, Bicego-Nahas et al. (Bicego-Nahas et al., 2001) reported that winter acclimation lowered resting metabolic rate in the closely related *Bufo paracnemis*. This is the opposite pattern of the increased resting metabolic rate in the cold-acclimated toads found here and in other studies (Feder, 1982; Seebacher and Franklin, 2011) and implies that seasonal effects metabolism differs from the direct influence of temperature *per se*. Nonetheless, our observation that acclimation exerted little impact on aerobic performance and aerobic scope overall does not support a mechanistic link between acclimation, oxygen transport capacity and thermal tolerance. In this respect, it is interesting that maximum critical temperature ( $CT_{max}$ ) of anuran amphibians can change more than 4°C when acclimated to either cold (5–10°C) or warm (25–35°C) conditions (Brattstrom, 1968). For *R. marina*, this plasticity may be somewhat confounded with estimates of plasticity ranging from 1 to 5°C for different populations and acclimation treatments (Brattstrom, 1968; Krakauer, 1970; Johnson, 1972). Clearly it would be interesting to investigate the relationship between  $CT_{max}$ , oxygen transport capacity and acclimation in amphibian species that demonstrate a consistent large acclimation response.

In conclusion, our study clearly demonstrates that the absolute increment in  $\dot{V}_{O_2}$  during exercise is maintained at high temperatures in a terrestrial ectothermic vertebrate. We did find a low  $Q_{10}$  for maximal heart rate between 30 and 40°C, but lactate levels of resting animals remained low and there was ample scope to increase both heart rate and oxygen transport at the highest temperatures tolerated by this species. It is unlikely, therefore, that limited oxygen transport determines the acute upper thermal limit in toads. We propose that a mechanistic understanding of upper thermal limits in this species should be sought in the collapse of other physiological systems than those concerning oxygen transport. Although we did not demonstrate a causal relationship between oxygen transport capacity and thermal tolerance in an air-breathing vertebrate, we encourage further studies on amphibians that constitute an appropriate model to investigate the applicability of the oxygen-limiting hypothesis in water- and air-breathers. This could, for example, be studied in the same individual in the larval (water-breathing) and adult (air-breathing) stages. A number of studies in insects have indicated that

the applicability of the aerobic scope model (oxygen-limiting hypothesis) depends on the respiratory medium and respiratory mode, and that it is therefore more applicable to water-breathing invertebrates (Klok et al., 2004; Stevens et al., 2010; Verberk and Calosi, 2012).

## LIST OF SYMBOLS AND ABBREVIATIONS

|                                |                                         |
|--------------------------------|-----------------------------------------|
| $CT_{max}$                     | maximum critical temperature            |
| $f_H$                          | heart rate                              |
| [Hb]                           | haemoglobin concentration               |
| [Hb <sub>4</sub> ]             | tetrameric haemoglobin concentration    |
| HbO <sub>2</sub>               | haemoglobin bound oxygen                |
| HbO <sub>2,sat</sub>           | haemoglobin oxygen saturation           |
| Hct                            | haematocrit                             |
| MAP                            | mean arterial pressure                  |
| MCHC                           | mean cellular haematocrit concentration |
| [O <sub>2</sub> ] <sub>a</sub> | arterial oxygen concentration           |
| $P_{aCO_2}$                    | arterial $P_{CO_2}$                     |
| $P_{aO_2}$                     | arterial oxygen tension                 |
| pH <sub>a</sub>                | arterial pH                             |
| RMR                            | resting metabolic rate                  |
| $\dot{V}_{O_{2,max}}$          | maximum rate of oxygen consumption      |
| $\alpha_{CO_2}$                | plasma solubility of CO <sub>2</sub>    |
| $\alpha_{O_2}$                 | plasma solubility of O <sub>2</sub>     |

## ACKNOWLEDGEMENTS

Special thanks are due to Heidi Meldgaard Jensen for animal husbandry, as well as Rasmus Buchanan, Gitte K. Hartvigsen and Kristian Overgaard for technical assistance.

## FUNDING

This study was funded by the Danish Research Council (J.O. and T.W.).

## REFERENCES

- Andersen, J. B. and Wang, T. (2002). Effects of anaesthesia on blood gases, acid–base status and ions in the toad *Bufo marinus*. *Comp. Biochem. Physiol.* **131**, 639–646.
- Andersen, J. B. and Wang, T. (2003). Cardiorespiratory effects of forced activity and digestion in toads. *Physiol. Biochem. Zool.* **76**, 459–470.
- Andersen, J. B., Jensen, F. B. and Wang, T. (2001). Effects of temperature and oxygen availability on circulating catecholamines in the toad *Bufo marinus*. *Comp. Biochem. Physiol.* **129**, 473–486.
- Andersen, J. B., Hedrick, M. S. and Wang, T. (2003). Cardiovascular responses to hypoxia and anaemia in the toad *Bufo marinus*. *J. Exp. Biol.* **206**, 857–865.
- Angilletta, M. J. (2009). *Thermal Adaptation: a Theoretical and Empirical Synthesis*. New York: Oxford University Press.
- Bicego-Nahas, K. C., Gargaglioni, L. H. and Branco, L. G. S. (2001). Seasonal changes in the preferred body temperature, cardiovascular, and respiratory responses to hypoxia in the toad, *Bufo paracnemis*. *J. Exp. Zool.* **289**, 359–365.
- Boutilier, R. G., Randall, D. J., Shelton, G. and Toews, D. P. (1979). Acid–base relationships in the blood of the toad, *Bufo marinus*. I. The effects of environmental CO<sub>2</sub>. *J. Exp. Biol.* **82**, 331–344.
- Brattstrom, B. H. (1968). Thermal acclimation in anuran amphibians as a function of latitude and altitude. *Comp. Biochem. Physiol.* **24**, 93–111.
- Brett, J. R. (1971). Energetic responses of salmon to temperature. A study of some thermal relations in the physiology and freshwater ecology of sockeye salmon (*Oncorhynchus nerka*). *Am. Zool.* **11**, 99–113.
- Bridge, C., Bicudo, J. and Lykkeboe, G. (1979). Oxygen content measurement in blood containing haemocyanin. *Comp. Biochem. Physiol.* **62**, 457–461.
- Cameron, J. N. (1971). Rapid method for determination of total carbon dioxide in small blood samples. *J. Appl. Physiol.* **31**, 632–634.
- Carey, C. (1979). Aerobic and anaerobic energy expenditure during rest and activity in montane *Bufo b. boreas* and *Rana pipiens*. *Oecologia* **39**, 213–228.
- Christoforides, C. and Hedley-Whyte, J. (1969). Effect of temperature and hemoglobin concentration on solubility of O<sub>2</sub> in blood. *J. Appl. Physiol.* **27**, 592–596.
- Clark, T. D., Ryan, T., Ingram, B. A., Woakes, A. J., Butler, P. J. and Frappell, P. B. (2005a). Factorial aerobic scope is independent of temperature and primarily modulated by heart rate in exercising Murray cod (*Maccullochella peelii peelii*). *Physiol. Biochem. Zool.* **78**, 347–355.
- Clark, T. D., Wang, T., Butler, P. J. and Frappell, P. B. (2005b). Factorial scopes of cardio-metabolic variables remain constant with changes in body temperature in the varanid lizard, *Varanus rosenbergi*. *Am. J. Physiol.* **288**, R992–R997.
- Clark, T. D., Jeffries, K. M., Hinch, S. G. and Farrell, A. P. (2011). Exceptional aerobic scope and cardiovascular performance of pink salmon (*Oncorhynchus gorbuscha*) may underlie resilience in a warming climate. *J. Exp. Biol.* **214**, 3074–3081.
- Cossins, A. R. and Bowler, K. (1987). *Temperature Biology of Animals*. New York: Chapman and Hall.

- Dejours, P. (1975). *Principles of Comparative Respiratory Physiology*. Amsterdam: North-Holland Publishing Company.
- Deutsch, C. A., Tewksbury, J. J., Huey, R. B., Sheldon, K. S., Ghalambor, C. K., Haak, D. C. and Martin, P. R. (2008). Impacts of climate warming on terrestrial ectotherms across latitude. *Proc. Natl. Acad. Sci. USA* **105**, 6668-6672.
- Eliason, E. J., Clark, T. D., Hague, M. J., Hanson, L. M., Gallagher, Z. S., Jeffries, K. M., Gale, M. K., Patterson, D. A., Hinch, S. G. and Farrell, A. P. (2011). Differences in thermal tolerance among sockeye salmon populations. *Science* **332**, 109-112.
- Farmer, C. (1997). Did lungs and the intracardiac shunt evolve to oxygenate the heart in vertebrates? *Paleobiology* **23**, 358-372.
- Farrell, A. P. and Clutterham, S. M. (2003). On-line venous oxygen tensions in rainbow trout during graded exercise at two acclimation temperatures. *J. Exp. Biol.* **206**, 487-496.
- Farrell, A. P., Eliason, E. J., Sandblom, E. S. and Clark, T. D. (2009). Fish cardiorespiratory physiology in an era of climate change. *Can. J. Zool.* **87**, 835-851.
- Feder, M. E. (1982). Environmental variability and thermal acclimation of metabolism in tropical anurans. *J. Therm. Biol.* **7**, 23-28.
- Fry, F. E. and Hart, J. S. (1948). The relation of temperature to oxygen consumption in the goldfish. *Biol. Bull.* **94**, 66-77.
- Gamperl, A. K., Milsom, W. K., Farrell, A. P. and Wang, T. (1999). Cardiorespiratory responses of the toad (*Bufo marinus*) to hypoxia at two different temperatures. *J. Exp. Biol.* **202**, 3647-3658.
- Hedrick, M. S., Palioca, W. B. and Hillman, S. S. (1999). Effects of temperature and physical activity on blood flow shunts and intracardiac mixing in the toad *Bufo marinus*. *Physiol. Biochem. Zool.* **72**, 509-519.
- Heisler, N. (1986). *Acid-Base Regulation in Animals*. San Diego, CA: Elsevier Science.
- Hillman, S. S. (1987). Dehydrational effects on cardiovascular and metabolic capacity in two amphibians. *Physiol. Zool.* **60**, 608-613.
- Hillman, S. S., Withers, P. C., Hedrick, M. S. and Kimmel, P. B. (1985). The effects of erythrocythemia on blood viscosity, maximal systemic oxygen transport capacity and maximal rates of oxygen consumption in an amphibian. *J. Comp. Biochem. Physiol. B* **155**, 577-581.
- Hofmann, G. E. and Todgham, A. E. (2010). Living in the now: physiological mechanisms to tolerate a rapidly changing environment. *Ann. Rev. Physiol.* **72**, 127-145.
- Johansen, K. and Hanson, D. (1968). Functional anatomy of the hearts of lungfishes and amphibians. *Am. Zool.* **8**, 191-210.
- Johnson, C. R. (1972). Thermal relations and daily variation in the thermal tolerance in *Bufo marinus*. *J. Herpetol.* **6**, 35-38.
- Keen, A. N. and Gamperl, A. K. (2012). Blood oxygenation and cardiorespiratory function in steelhead trout (*Oncorhynchus mykiss*) challenged with an acute temperature increase and zatebradine-induced bradycardia. *J. Therm. Biol.* **37**, 201-210.
- Klok, C. J., Sinclair, B. J. and Chown, S. L. (2004). Upper thermal tolerance and oxygen limitation in terrestrial arthropods. *J. Exp. Biol.* **207**, 2361-2370.
- Krakauer, T. (1970). Tolerance limits of the toad, *Bufo marinus*, in South Florida. *Comp. Biochem. Physiol.* **33**, 15-26.
- Mackinnon, M. R. and Heatwole, H. (1981). Comparative cardiac anatomy of the reptilia. IV. The coronary arterial circulation. *J. Morphol.* **170**, 1-27.
- Marshall, D. J., Dong, Y. W., McQuaid, C. D. and Williams, G. A. (2011). Thermal adaptation in the intertidal snail *Echinolittorina malaccana* contradicts current theory by revealing the crucial roles of resting metabolism. *J. Exp. Biol.* **214**, 3649-3657.
- McCormick, J. H., Hokanson, K. E. F. and Jones, B. R. (1972). Effects of temperature on growth and survival of young brook trout, *Salvelinus fontinalis*. *J. Fish. Res. Board Can.* **29**, 1107-1112.
- Neuheimer, A., Thresher, R., Lyle, J. and Semmens, J. (2011). Tolerance limit for fish growth exceeded by warming waters. *Nature Clim. Change* **1**, 110-113.
- Nilsson, G. E., Crawley, N., Lunde, I. G. and Munday, P. L. (2009). Elevated temperature reduces the respiratory scope of coral reef fishes. *Glob. Change Biol.* **15**, 1405-1412.
- Parmesan, C. and Yohe, G. (2003). A globally coherent fingerprint of climate change impacts across natural systems. *Nature* **421**, 37-42.
- Perry, A. L., Low, P. J., Ellis, J. R. and Reynolds, J. D. (2005). Climate change and distribution shifts in marine fishes. *Science* **308**, 1912-1915.
- Pörtner, H. O. (2001). Climate change and temperature-dependent biogeography: oxygen limitation of thermal tolerance in animals. *Naturwissenschaften* **88**, 137-146.
- Pörtner, H. O. and Farrell, A. P. (2008). Ecology. Physiology and climate change. *Science* **322**, 690-692.
- Pörtner, H. O. and Knust, R. (2007). Climate change affects marine fishes through the oxygen limitation of thermal tolerance. *Science* **315**, 95-97.
- Schmidt-Nielsen, K. (1997). *Animal Physiology: Adaptation and Environment*. Cambridge: Cambridge University Press.
- Seebacher, F. and Franklin, C. E. (2011). Physiology of invasion: cane toads are constrained by thermal effects on physiological mechanisms that support locomotor performance. *J. Exp. Biol.* **214**, 1437-1444.
- Somero, G. N. (2010). The physiology of climate change: how potentials for acclimatization and genetic adaptation will determine 'winners' and 'losers'. *J. Exp. Biol.* **213**, 912-920.
- Somero, G. N. (2012). The physiology of global change: linking patterns to mechanisms. *Ann. Rev. Mar. Sci.* **4**, 39-61.
- Stevens, M. M., Jackson, S., Bester, S. A., Terblanche, J. S. and Chown, S. L. (2010). Oxygen limitation and thermal tolerance in two terrestrial arthropod species. *J. Exp. Biol.* **213**, 2209-2218.
- Stuart, L. (1951). The distributional implications of temperature tolerances and hemoglobin values in the toads *Bufo marinus* (Linnaeus) and *Bufo bocourti* Brocchi. *Copeia* **1951**, 220-229.
- Thomas, C. D., Cameron, A., Green, R. E., Bakkenes, M., Beaumont, L. J., Collingham, Y. C., Erasmus, B. F. N., De Siqueira, M. F., Grainger, A., Hannah, L. et al. (2004). Extinction risk from climate change. *Nature* **427**, 145-148.
- Tucker, V. A. (1967). Method for oxygen content and dissociation curves on microliter blood samples. *J. Appl. Physiol.* **23**, 410-414.
- Verberk, W. C. E. P. and Calosi, P. (2012). Oxygen limits heat tolerance and drives heat hardening in the aquatic nymphs of the gill breathing damselfly *Calopteryx virgo* (Linnaeus, 1758). *J. Therm. Biol.* **37**, 224-229.
- Wang, T. and Overgaard, J. (2007). Ecology. The heartbreak of adapting to global warming. *Science* **315**, 49-50.
- Wang, T., Hedrick, M. S., Ihmied, Y. M. and Taylor, E. W. (1999). Control and interaction of the cardiovascular and respiratory systems in anuran amphibians. *Comp. Biochem. Physiol.* **124**, 393-406.
- Whitford, W. G. (1973). The effects of temperature on respiration in the Amphibia. *Am. Zool.* **13**, 505-512.
- Williams, S. E., Shoo, L. P., Isaac, J. L., Hoffmann, A. A. and Langham, G. (2008). Towards an integrated framework for assessing the vulnerability of species to climate change. *PLoS Biol.* **6**, e325.
- Withers, P. C., Hillman, S. S., Simmons, L. A. and Zygmunt, A. C. (1988). Cardiovascular adjustments to enforced activity in the anuran amphibian, *Bufo marinus*. *Comp. Biochem. Physiol.* **89**, 45-49.
- Zijlstra, W. G., Buursma, A. and Zwart, A. (1983). Molar absorptivities of human hemoglobin in the visible spectral range. *J. Appl. Physiol.* **54**, 1287-1291.
